1     **Epigenetic variation in the Lombardy poplar along climatic gradients is independent of**  
2                     **genetic structure and persists across clonal reproduction**

3

4     Bárbara Díez Rodríguez<sup>1,2</sup>, Dario Galanti<sup>3</sup>, Adam Nunn<sup>4,5</sup>, Cristian Peña-Ponton<sup>6,7</sup>, Paloma  
5     Pérez-Bello<sup>8</sup>, Iris Sammarco<sup>9,10</sup>, Katharina Jandrasits<sup>11</sup>, Claude Becker<sup>11,12</sup>, Emanuele De Paoli<sup>13</sup>,  
6     Koen J.F Verhoeven<sup>6</sup>, Lars Opgenoorth<sup>1,14</sup>, Katrin Heer<sup>1,2</sup>

7

8     <sup>1</sup> Plant Ecology and Geobotany, Department of Biology, Philipps-University Marburg, Karl-von-Frisch  
9     Strasse 8 | D-35043 Marburg

10    <sup>2</sup> Department of forest genetics, Albert-Ludwigs-Universität Freiburg, Bertoldstraße 17, 79098 Freiburg i.  
11    Br., Germany

12    <sup>3</sup> Plant Evolutionary Ecology, Institute of Evolution and Ecology, University of Tübingen, 72076 Tübingen,  
13    Germany.

14    <sup>4</sup> ecSeq Bioinformatics GmbH, Leipzig 04103, Germany

15    <sup>5</sup> Institute for Computer Science, University of Leipzig, Leipzig 04107, Germany

16    <sup>6</sup> Department of Terrestrial Ecology, Netherlands Institute of Ecology (NIOO-KNAW), Droevendaalsesteeg  
17    10, 6708 PB Wageningen, Netherlands

18    <sup>7</sup> Department of Life sciences and Agriculture, Biotechnology, Universidad de las Fuerzas Armadas  
19    ESPE, Av. General Rumiñahui s/ny Ambato, Sangolquí, Ecuador

20    <sup>8</sup> IGA Technology Services Srl. Via Jacopo Linussio 51, 33100 Udine UD, Italy

21    <sup>9</sup> Institute of Botany, Czech Academy of Sciences, Zámek 1, 252 43 Průhonice, Czechia.

22    <sup>10</sup> Department of Botany, Faculty of Science, Charles University, Benátská 2, 128 01 Prague, Czechia

23    <sup>11</sup> Gregor Mendel Institute of Molecular Plant Biology, Austrian Academy of Sciences, Vienna BioCenter  
24    (VBC), 1030 Vienna, Austria

25    <sup>12</sup> LMU Biocenter, Faculty of Biology, Ludwig-Maximilians-University Munich, 82152 Martinsried, Germany

26 <sup>13</sup> Department of AgriFood, Environmental and Animal Sciences, University of Udine. via delle Scienze  
27 206, 33100 Udine, Italy

28 <sup>14</sup> Biodiversity and Conservation Biology, Swiss Federal Research Institute WSL, Zürcherstrasse 111 |  
29 CH-8903 Birmensdorf

30 \*Corresponding author: Bárbara Díez Rodríguez, Katrin Heer, Lars Opgenoorth

31 ORCID:

32 Bárbara Díez Rodríguez: 0000-0003-3534-7197

33 Dario Galanti: 0000-0002-6567-1505

34 Adam Nunn: 0000-0002-9276-6243

35 Cristian Peña: 0000-0003-0671-2124

36 Paloma Perez-Bello: 0000-0002-0987-1481

37 Iris Sammarco: 0000-0002-4101-6223

38 Katharina Jandrasits: 0000-0002-0161-582X

39 Claude Becker: 0000-0003-3406-4670

40 Emanuele de Paoli: 0000-0003-3646-7692

41 Koen Verhoeven: 0000-0003-3002-4102

42 Lars Opgenoorth: 0000-0003-0737-047X

43 Katrin Heer: 0000-0002-1036-599X

44

45 Keywords: *Populus nigra* cv 'Italica', DNA methylation, whole genome bisulfite sequencing  
46 (WGBS), differentially methylated regions (DMR), acclimation, adaptation

47

48

49

## 50 Summary

51

52 - Environmental changes can trigger phenotypic variation in plants through  
53 epigenetic mechanisms, but strong genetic influences make it difficult to isolate  
54 and study epigenetic effects. Clonal trees with low genetic variation, such as the  
55 Lombardy poplar (*Populus nigra* cv. 'Italica' Duroi), offer a unique system to  
56 study epigenetic variation associated with the environment.

57 - We collected cuttings (ramets) of Lombardy poplar along a wide geographical  
58 range in Europe. We performed whole-genome-bisulfite sequencing of 164  
59 ramets grown in a common garden and of a subset of 35 of the original parental  
60 individuals. Using historical bioclimatic data, we tested the relationship between  
61 DNA methylation and climatic gradients.

62 - We found that average methylation levels in TEs and promoter regions correlate  
63 with biologically relevant climatic variables. Furthermore, we observed that DNA  
64 methylation was transmitted to the next clonal generation, but a fraction of the  
65 methylome changed relatively fast when comparing the parental individuals with  
66 the clonal offspring.

67 - Our results suggest that the poplar methylome is a dynamic layer of information  
68 that can be transmitted to the clonal offspring and potentially affect how poplars  
69 acclimate to new environmental conditions.

70

71

## 72 Introduction

73 In the last couple of decades, extreme weather events have been increasing, often  
74 exceeding plants' and animals' tolerance thresholds, and driving mass mortalities in  
75 many species (IPCC, 2022). Understanding how plants respond to such weather events  
76 and other environmental conditions has thus become crucial for conservation policies  
77 and forest management programs. In studies on plant natural populations, intraspecific  
78 genetic diversity has been shown to contribute to the resistance and resilience of  
79 populations (Hughes et al., 2008). Genetic variation provides the baseline for  
80 phenotypic variation on which evolutionary processes can act, and plays an important  
81 role in plant adaptation (Fisher, 1958; Hughes *et al.*, 2008). However, advances in  
82 molecular biology and genomics have shown that phenotypic variation among  
83 individuals is not only determined by genetic variation (Rapp & Wendel, 2005). One  
84 additional cause of phenotypic variation is epigenetic variation (Cubas *et al.*, 1999;  
85 Manning *et al.*, 2006; Xie *et al.*, 2015). Several studies have shown that epigenetic  
86 variation can be spatially structured among and within plant populations, and that such  
87 a structure can be associated with environmental variation and phenotypic  
88 differentiation (Lira-Medeiros et al., 2010; Medrano et al., 2014; Avramidou et al., 2015;  
89 Kawakatsu et al., 2016; de Kort et al., 2020; Boquete et al., 2021; Galanti et al., 2022,  
90 Sammarco et al., 2022). Although causal relationships remain to be studied, such  
91 observations suggest that epigenetic variation could contribute to the acclimation of  
92 plants to changes in environmental conditions.

93 There are several molecular mechanisms involved in epigenetic variation, such as

94 histone modifications, DNA methylation and small RNA-mediated processes (reviewed  
95 in Lloyd and Lister, 2022). Among these, DNA cytosine methylation (mC), is currently  
96 the most widely studied and best characterized modification (Zemach *et al.*, 2013;  
97 Matzke & Moshier, 2014; Zhang *et al.*, 2018; Lloyd & Lister, 2022) and consists of a  
98 base alteration in which a methyl group is added to the 5th carbon of a cytosine (Moore  
99 *et al.*, 2012). In plants, cytosine methylation occurs at three different sequence contexts:  
100 CG, CHG and CHH, where H = A, T or C. Methylation at the CG and CHG contexts is  
101 usually symmetrical across both DNA strands, whereas methylation at CHH sites is  
102 asymmetrical (Meyer *et al.*, 1994; Finnegan *et al.*, 2003; Zhang *et al.*, 2006; Lister *et al.*,  
103 2008). As a result of different mechanisms involved in DNA methylation maintenance,  
104 different sequence contexts differ in their degrees of *mitotic stability*, which are mainly  
105 dictated by their symmetry. In the symmetrical contexts, methylation maintenance is  
106 guided by the complementary DNA strand, and thus stably inherited across mitotic  
107 divisions (Niederhuth & Schmitz 2014). On the other hand, methylation in the  
108 asymmetrical context is maintained mainly by *de novo* establishment and thus less  
109 stable across cell divisions (Peter Meyer & Lohuis, 1994). In addition, depending on the  
110 genomic feature context, DNA methylation has different roles. For example, methylation  
111 in all sequence contexts is associated with silencing of transposable elements (TEs),  
112 while CG methylation is found in promoters of transcriptionally inactive genes and in the  
113 gene body of active genes (reviewed in Niederhuth & Schmitz, 2017). Variation in DNA  
114 methylation can be under genetic control (Zhang *et al.*, 2018; Johannes & Schmitz,  
115 2019) and arise stochastically as a result of imperfect DNA methylation maintenance  
116 (Becker *et al.*, 2011; Schmitz *et al.*, 2011; Johannes & Schmitz, 2019), or be induced by

117 environmental conditions (Raj *et al.*, 2011; Bräutigam *et al.*, 2013; Lämke & Baurle,  
118 2017). Furthermore, some of these methylation marks can be transmitted from parental  
119 individuals to offspring (Johannes *et al.*, 2009; Becker & Weigel, 2012; Herman &  
120 Sultan, 2016; Gáspár *et al.*, 2019; Boquete *et al.*, 2021). If DNA methylation can be  
121 induced by environmental conditions, we would expect patterns of DNA methylation to  
122 be associated with geographic or climatic gradients beyond what can be explained by  
123 the underlying genetic structure of the studied population. Several studies indeed found  
124 correlations between methylation patterns and habitat or climate in different plant  
125 species. However, almost all these studies were conducted on sexually reproducing  
126 plant species, were constrained to small-scale geographic gradients, or used low-  
127 resolution molecular methods (Lira-Medeiros *et al.*, 2010; Nicotra *et al.*, 2015;  
128 Avramidou *et al.*, 2015; Gugger *et al.*, 2016; Herrera *et al.*, 2017; Gáspár *et al.*, 2019).  
129 With the continuous decrease of sequencing costs, recent studies based on whole  
130 genome bisulfite sequencing (WGBS) have provided more detailed methylation data  
131 (Dubin *et al.*, 2015; Kawakatsu *et al.*, 2016; de Kort *et al.*, 2020; Galanti *et al.*, 2022).  
132 With WGBS we can now quantify methylation at the scale of whole genomes and  
133 accurately map methylated cytosines at a single-base resolution (Lister and Ecker,  
134 2009). Nevertheless, the extent to which genetic variation influences epigenetic  
135 variation is still not clear (Richards *et al.*, 2010, 2017). Studying epigenetic variation in  
136 asexually (i.e. clonally) reproducing species allows focusing on epigenetic variation in  
137 the absence of confounding genetic variation. Moreover, during sexual reproduction,  
138 some proportion of the methylation patterns might be reset (Wibowo *et al.*, 2016),  
139 whereas we assume that they are faithfully transmitted during clonal propagation. Thus

140 epigenetic marks have therefore the potential to be stably transmitted across clonal  
141 generations and may thus create heritable phenotypic variation (Verhoeven & Preite,  
142 2014).

143 Since the first assembly of the *P. trichocarpa* genome in 2006, the amount of available  
144 genetic, genomic, and biochemical resources have increased considerably, and  
145 *Populus* species have become a model for studying plant adaptation (Taylor, 2002;  
146 Tuskan et al., 2006; Jansson & Douglas, 2007). The Lombardy poplar (*Populus nigra*  
147 cv. 'Italica' Duroi) is a widely distributed tree clone. This variety likely originated in the  
148 18th century from one single male tree of *P. nigra*, located in central Asia (Elwes &  
149 Henry, 1913), and was spread by cuttings worldwide from Italy. It is assumed that most  
150 Lombardy poplars originate from artificial propagation performed by humans (CABI,  
151 2022).

152 Here, we present the first study investigating DNA methylation variation in a clonal tree  
153 species. We collected poplar cuttings from a wide climatic and geographic gradient  
154 across Europe and planted them in a common garden in Central Germany. We  
155 analyzed methylation variation among trees in the field and in the common garden.  
156 Thus we were able to address two questions: (1) given a uniform genetic background,  
157 do different environmental conditions result in differences in DNA methylation in  
158 Lombardy poplar? If so, (2) do these differences persist over time after clonal  
159 propagation in a common environment?

160

161

## 162 **Materials and Methods**

### 163 **Plant material and common garden design**

164 Between February and March 2018, we sampled cuttings from *Populus nigra* cv 'Italica'  
165 clones in Europe across geographical gradients that spanned from 41° to 60° N and -5°  
166 to 25° E approximately, at twelve sampling sites that covered seven different Köppen-  
167 Geiger climate subtypes (Peel *et al.*, 2007). We tagged and georeferenced the source  
168 trees (hereafter referred to as "ortets"). During the first week of May 2018, we planted  
169 the cuttings (hereafter referred to as "ramets") in a common garden in the Marburg  
170 Botanical Garden (Germany) under a random block design. The common garden area  
171 was not shaded in any way, allowing the ramets to grow under direct sunlight. No  
172 herbicides, pesticides, or fertilizers were used in the common garden. We planted the  
173 ramets with 1 m between trees and watered them frequently for a period of five months  
174 until the end of summer. A more detailed description of sampling and the common  
175 garden set-up can be found in Díez Rodríguez *et al.*, (2022).

176

### 177 **Whole genome bisulfite sequencing**

178 Of the 375 individuals considered to belong to the same genotype by Díez Rodríguez *et*  
179 *al.* (2022), we selected a subset for WGBS. We chose 14 ramets from 12 sampling sites  
180 from the common garden, except for those from Lithuania, of which only 10 ramets had  
181 survived in the garden, resulting in a total of 164 individuals. From the original set of  
182 ortets, we chose 5 individuals from seven out of the 12 sampling sites, with a total of 35



183 individuals. We collected leaf material from individuals, both in the field and in the  
184 common garden, at approximately the same time in July 2018. We extracted DNA from  
185 leaf tissue obtained from mature, healthy leaves dried in silica gel using the PeqGOLD  
186 Plant DNA mini kit (PEQLAB Biotechnologie GmbH, Erlangen, Germany). We used the  
187 NEBNext Ultra II DNA Library Prep Kit for sequencing library preparation, combined  
188 with EZ-96 DNA Methylation-Gold MagPrep (ZYMO) for bisulfite libraries. The protocol  
189 involved: i) end repair and 3' adenylation of sonicated DNA fragments, ii) NEBNext  
190 adaptor ligation and U excision, iii) size selection with AMPure XP Beads (Beckman  
191 Coulter, Brea, CA), iv) bisulfite treatment and cleanup of libraries, v) PCR enrichment  
192 and index ligation using Kapa HiFi Hot Start Uracil+ Ready Mix (Agilent) for bisulfite  
193 libraries (14 cycles), vi) final size selection and cleanup. Finally, we sequenced paired-  
194 end for 150 cycles on a HiSeq X Ten instrument (Illumina, San Diego, CA). All  
195 sequenced raw fastq files are available at the European Nucleotide Archive (ENA)  
196 database, under project number PRJEB44879.

197

### 198 **Methylation data and DMR calling**

199 For the methylation analysis we used the EpiDiverse toolkit (version 1.0), a pipeline  
200 suite for WGBS data analysis in non-model plant species (Nunn *et al.*, 2021). For  
201 alignment, quality control, and methylation extraction we used the WGBS pipeline. This  
202 pipeline uses FastQC (<https://www.bioinformatics.babraham.ac.uk/projects/fastqc/>) to  
203 perform quality control, erne-bs5 (Prezza *et al.*, 2012; <http://erne.sourceforge.net/>) to  
204 map raw reads, Picard MarkDuplicates (<https://broadinstitute.github.io/picard/>) to filter  
205 PCR duplicates and MethylDackel (<https://github.com/dpryan79/MethylDackel>) to

206 perform the methylation calling. We mapped the samples to the *Populus nigra* cv  
207 'Italica' reference genome, freely available at the European Nucleotide Archive (ENA)  
208 under project number PRJEB44889. We only retained uniquely-mapping reads longer  
209 than 36 bp. On average, around 80% of the total number of reads were mapped to the  
210 reference genome. We calculated the bisulfite non-conversion rate using the  
211 mitochondrial genome, and found a mean rate of 0.005. Mapping stats and conversion  
212 rates for each individual sample are shown in Supplementary Table 1. Methylation  
213 levels for each called position were calculated according to Schultz et al. (2012) and  
214 using the following formula ( $C$  = reads supporting methylated cytosine,  $T$  = reads  
215 supporting unmethylated cytosine,  $i$  = position of cytosine):

$$216 \quad (C_i / (C_i + T_i)) * 100$$

217 We obtained individual bedGraph files for each sample and context. We filtered out  
218 positions with a coverage lower than 6. For five ramet samples, less than 60% of the  
219 initial positions remained after filtering, and were thus excluded from the data set. We  
220 then merged the individual files into multisample bed files using custom scripts based  
221 on the *unionbedg* command from the BEDTools suite (Quinlan & Hall, 2010), retaining  
222 positions that were called in at least 80% of the samples. To directly compare only  
223 positions with methylation calls common to all samples, we obtained three different files  
224 per context. The first file contained 35 ortet samples (as mentioned in the plant material  
225 section); the second file contained 158 ramet samples; and lastly, the third file  
226 contained 64 paired ortet and ramet samples (32 samples from ortets and 32 from their  
227 respective ramets). A summary of the number of samples and the number of positions  
228 retained in each file is shown in Table 1. To study the epigenetic structure of the poplar

229 clones, we ran Principal Component Analysis (PCA) per context using the *prcomp*  
230 function of the *stats* package (ver. 4.1.3; R Core Team, 2022).

231

232 Table 1. Summary of number of samples and positions included in each file used for  
233 methylation analysis

| Type of file | N Samples | N positions per context |            |            |
|--------------|-----------|-------------------------|------------|------------|
|              |           | CpG                     | CHG        | CHH        |
| Ortet        | 35        | 8,318,522               | 13,678,685 | 76,501,469 |
| Ramet        | 158       | 7,820,008               | 12,961,553 | 72,754,297 |
| Paired       | 64        | 8,139,896               | 13,412,560 | 75,215,708 |

234

235 The EpiDiverse toolkit (Nunn *et al.*, 2021) includes a DMR pipeline that uses metilene  
236 (Jühling *et al.*, 2016) to call Differentially Methylated Regions (DMRs) between all  
237 possible pre-defined pairwise comparisons between sites for each sequence context.  
238 We used the default parameters of the DMR pipeline to define DMRs. In this study,  
239 each sampling site where the ramets were collected was considered as an individual  
240 group and compared to all the other sites. DMRs were called among three different  
241 group sets. First, we ran the DMR pipeline using only groups containing ortet samples in  
242 each pairwise comparison; second, we compared groups containing only ramet  
243 samples; and third, we compared ortet samples with their paired ramet samples. We

244 then used custom scripts to summarize the results of the pipeline, and obtained a single  
245 file for each context and each run with a list of all DMRs, their genomic coordinates, and  
246 the specific pairwise comparison they belonged to. Supplementary Figure 1 shows a  
247 schematic description of the pairwise comparison design.

## 248 **Variant calling, filtering and imputation**

249 We used the EpiDiverse SNP pipeline (Nunn *et al.*, 2021, 2022) with default parameters  
250 to infer Single Nucleotide Polymorphisms (SNPs) from WGBS data. We combined the  
251 output of individual Variant Call Format (VCF) files from the ramet samples into a  
252 multisample VCF file using BCFtools (v1.9, Danecek et al., 2011). We filtered for  
253 variants successfully genotyped in at least 90% of individuals, with a minimum quality  
254 score of 30 and a minimum mean depth of 3. For the PCA analysis, we retained only  
255 biallelic SNPs and removed SNPs with more than 10% missing values and a Minor  
256 Allele Frequency (MAF) < 0.01. The remaining missing values were imputed with  
257 BEAGLE v 5.1 (Browning, Zhou, and Browning 2018). We also removed SNPs that  
258 were heterozygous in more than 95% of the samples. To reduce the number of SNPs  
259 for downstream analysis, we filtered redundant SNPs by pruning for Linkage  
260 Disequilibrium (LD) with a maximum LD of 0.8 between SNP pairs in a sliding window of  
261 50 SNPs. After filtering and imputing, we were able to retain 343,977 SNPs. We  
262 performed the PCA analysis with PLINK (v1.90b6.12, Purcell et al., 2007) and plotted  
263 the results with custom scripts in R (<https://github.com/EpiDiverse/scripts>).

264

265

## 266 **Correlation between methylation and bioclimes**

267 To assess correlations between methylome variation and climatic variables, we  
268 obtained bioclimatic data for each of the locations of the ortets from the CHELSA time-  
269 series data set (Karger *et al.*, 2017). The CHELSA data set covers the period between  
270 1979 and 2013 and provides gridded data at a resolution of 30 arcsec (~ 1km). We  
271 included all 19 bioclimatic variables, as described in the CHELSA web page:  
272 <https://chelsa-climate.org/bioclim/>. Bioclimatic data for all sequenced individuals is  
273 available in Zenodo at <https://doi.org/10.5281/zenodo.5995424>. The methylation data  
274 for specific genomic regions used in the correlation analysis was obtained using the  
275 BEDTools *intersect* command (Quinlan and Hall, 2010) and a custom structural  
276 annotation. The annotations are available at the European Nucleotide Archive (ENA)  
277 under project number PRJEB44889. We correlated average global methylation levels  
278 with CHELSA bioclimes using the Spearman method. The analysis was performed with  
279 the *corr.test* function of the *psych* package (ver. 2.2.5, Revelle, 2022) and plotted using  
280 the *heatmap.2* function of the *gplots* package (ver. 3.1.3, Warnes et al., 2022).

## 281 **Mantel tests**

282 To investigate if epigenetic distance between individual ramets was correlated with  
283 geographic, climatic and/or genetic distance, we performed mantel tests, using the  
284 *mantel* function of the *vegan* package (ver. 2.5-7; Oksanen et al., 2013). As input for the  
285 geographic and climatic distance matrices, we used the original geographic coordinates  
286 and the bioclimatic data of the ramets. We calculated two types of epigenetic distance  
287 matrices. The first matrix was based on the methylation levels of single methylated

288 positions (MPs). In the second matrix, we used the BEDTools suit to merge the DMRs  
289 called from multiple pairwise comparisons in order to obtain a union set of candidate  
290 regions, variable between two or more populations of ramets. We then calculated mean  
291 methylation levels (according to Schultz et al. 2012) in each region. For the genetic  
292 distance matrix we used the same SNPs that were used for the genetic structure  
293 analysis. To standardize the data and make it comparable, we then conducted a PCA  
294 and calculated the first three PCs for each type of input. We then created Euclidean  
295 distance matrices using the *dist* function of the R *stats* package (Version 4.2.1, R core  
296 team, 2022). Finally, we ran the mantel tests with the Pearson correlation method and  
297 9999 permutations.

### 298 **Persistence of DNA methylation patterns**

299 To study if methylation patterns were conserved across clonal generations, we focused  
300 on the seven sites for which we had collected samples from ortets and ramets. We  
301 called DMRs between sites for ortets, for ramets, and between ortets and ramets from  
302 each site. Supplementary Figure S2 shows the total number of DMRs for each pairwise  
303 comparison among ortets (A) and ramets (B), respectively, ordered according to latitude  
304 of origin from South to North. If methylation patterns are conserved in the next clonal  
305 generation we assumed we would be able to find the same DMRs when comparing the  
306 same sampling-site pairs between ortets and between ramets. We therefore intersected  
307 the bed files with all the DMRs called using the BEDTools intersect command.  
308 Specifically, we intersected a file containing DMRs called from group A vs group B  
309 ortets with a file containing DMRs called from ramets belonging to the same groups (i.e.  
310 corresponding to the clonal offspring). We then repeated the analysis for each of the 21

311 possible pairwise comparisons between sites. Supplementary Figure S4 shows a  
312 detailed count of hypermethylated and hypomethylated DMRs for each pairwise  
313 comparison. After running the intersections, we created individual files containing all the  
314 regions found among ramets that overlap with regions found among ortets.

## 315 Results

### 316 Methylation profiles in the Lombardy poplar

317 Average global methylation in ramets of the Lombardy poplar from 12 different sampling  
318 sites ranged from 30 to 40% in the CG context, 15-25% in the CHG context and 1-3% in  
319 the CHH context (Figure 1A). We did not find any statistically significant differences  
320 among methylation levels from different sites in any of the contexts, and variation within  
321 each group seemed to be higher than the variation among groups. We found the  
322 highest number of DMRs in the CHG context (~130,000 DMRs), followed by the CG  
323 context (~ 70,000 DMRs) and the CHH context, where only ~ 9,100 DMRs were called  
324 among all pairwise comparisons among sites (Figure 1B). However, most of these  
325 DMRs were common to two or more comparisons. When common DMRs were merged  
326 into unique regions, we found around 11,400 CG-DMRs, 14,400 CHG-DMRs and 4,100  
327 CHH-DMRs. The length of the merged DMRs ranged from 10 to around 5,000 bases  
328 (Supplementary figure S3). Of these DMRs, a considerable fraction overlapped with  
329 annotated transposable elements (TEs) in all sequence contexts (~4,600; ~ 10,500 and  
330 4,200, respectively for CG, CHG and CHH). Interestingly, only 31 DMRs in the CHH  
331 context overlapped with coding sequences (CDS), while around 4,600 CG- and 3,100  
332 CHG-DMRs overlapped with these regions (Figure 2c).

**a**

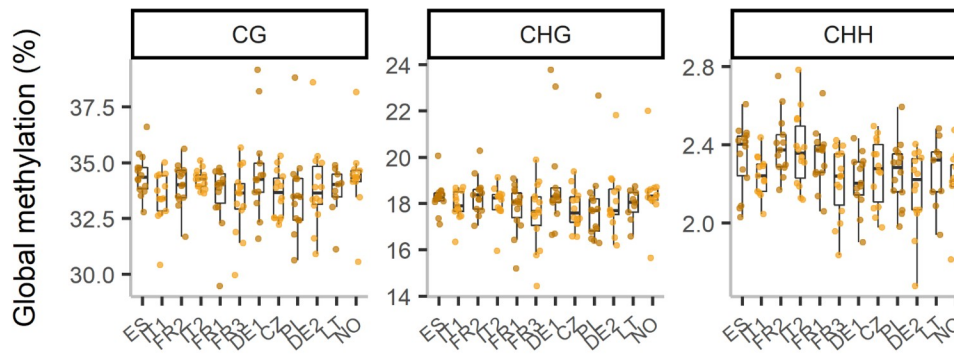

**b**

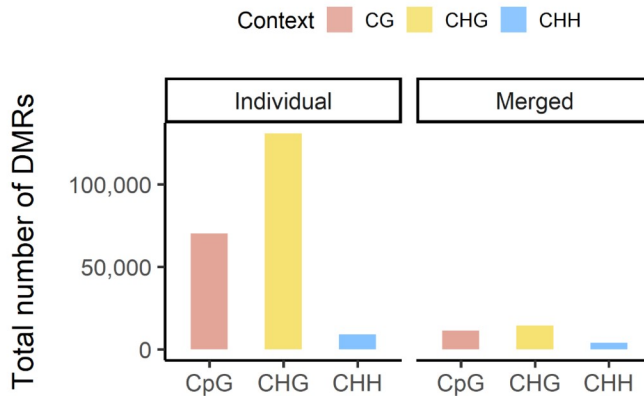

**c**

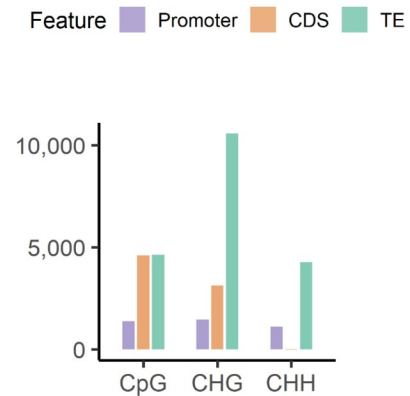

333

334 Figure 1. Methylation profiles in the Lombardy poplar (ramets). **a.** Variation in  
 335 methylation levels among ramets across geographical gradients in all sequence  
 336 contexts. Sites are ordered from South to North according to their geographic  
 337 coordinates and labeled by the sample site code (ISO 3166 standard country code): ES:  
 338 Spain, n = 14 ; IT1: Italy 1, n = 13; FR2: France 2, n = 13; IT2: Italy 2, n = 14; FR1:  
 339 France 1, n = 14; FR3: France 3, n = 14; DE1: Germany 1, n = 13; CZ: Czech Republic,  
 340 n = 14; PL: Poland, n = 14; DE2: Germany 2, n = 14; LT: Lithuania, n = 9; NO: Norway,  
 341 n = 12. Note the different scales in the Y axes (n = 158). **b.** Total number of DMRs in



342 each sequence context, called from all pairwise comparisons ( $n = 158$ ). Number of  
343 individual DMRs is the sum of DMRs obtained from all pairwise comparisons. Total  
344 number of merged DMRs corresponds to regions that were merged into unique DMRs  
345 **c.** Total number of merged DMRs overlapping specific genomic features in each  
346 sequence context ( $n = 158$ ).

347

348

### 349 **Genetic and epigenetic structure**

350 To investigate a potential relationship between genetic and epigenetic structure in the  
351 Lombardy poplar, we conducted a Principal Component Analysis (PCA) based on  
352 methylated positions (MPs) and SNPs inferred from WGBS of the ramet samples.  
353 Among the sequenced 'Italica' clones, we did not find any clear genetic structure that  
354 could be associated with the geographic origin of the ramets (Figure 2a). As explained  
355 in Díez Rodríguez et al. (2022), the ramets that belonged to the 'Italica' cluster had a  
356 mean number of pairwise differences among individual ramets of around 96 SNPs out  
357 of the 4,906 investigated remaining positions. We targeted 4,906 loci equally distributed  
358 across the 19 *P. nigra* chromosomes selected from a larger set identified in Scaglione  
359 et. al (2019), which should allow for accurate and effective genotyping of population  
360 groups. To further assess if the loci targeted were actually sufficient for genotyping the  
361 populations analyzed, we called SNPs from the WGBS data. In this way, we increased  
362 the number of SNPs available for the study to 986,948 SNPs, mostly reflecting  
363 heterozygosity of the clonal genotype, not genetic differences between samples. After  
364 we removed SNPs heterozygous in  $> 95\%$  of the samples and performed the pruning  
365 step, 343,977 SNPs remained for the analysis. Still, we did not find any genetic

366 structure that could be associated with geographic patterns. On the other hand, despite  
367 the lack of genetic structure, some individuals with the same site of origin seemed to  
368 group together (Figures 2b and S5), indicating similar methylation profiles, specially in  
369 the CG context. Furthermore, when running PCA with MPs inside CDS (Figure S4), we  
370 observed some grouping, but this was not explained by any of the environmental  
371 variables that we tested (such as habitat type, elevation or habitat disturbance level).  
372

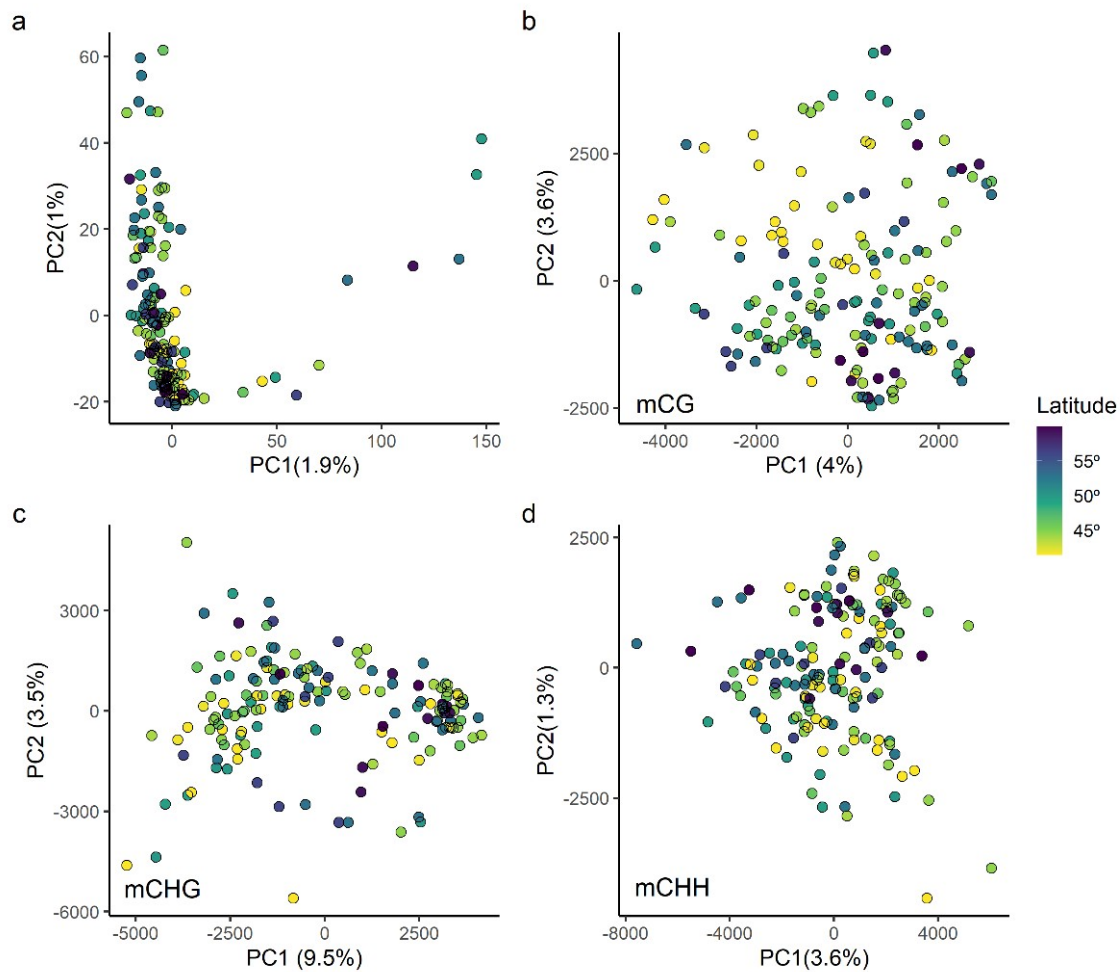

373

374

375 Figure 2. Genetic and epigenetic structure of the poplar ramets, colored according to latitude of  
376 origin. **a**: Genetic structure based on the SNPs called from WGBS data. **b-d**: Epigenetic  
377 structure for the CG (b), CHG (c) and CHH (d) sequence contexts.

378

### 379 **Relationship between methylation, geographic origin, and climate**

380 To assess if there was any relationship between epigenetic variation, genetic variation,  
381 geographic origin, and climatic conditions, we analyzed the correlation between  
382 epigenetic distance and genetic, geographic, and climatic distance in ramets using  
383 mantel tests. We first correlated geographic with climatic distance, and genetic with both  
384 geographic and climatic distance. We found that climatic distance correlated with  
385 geographic distance ( $R = 0.7$ ,  $p = 0.001$ ), but genetic distance was not correlated with  
386 geographic distance or climatic distance ( $R = -0.03$ ,  $p = \text{ns}$ , in both tests). We created  
387 epigenetic distance matrices based on MPs and DMRs. We did not find any correlation  
388 between epigenetic and genetic distance in any case, except for the MPs in the CHH  
389 context (Table 2). However, epigenetic distance significantly correlated with geographic  
390 and climatic distance in almost all cases. The highest correlation coefficients were found  
391 in the CG context between DMR-based epigenetic distance and both geographic and  
392 climatic distance ( $R=0.164$  and  $p < 0.001$ , and  $R=0.141$  and  $p < 0.001$ , respectively).  
393 Because geographic distance and climatic distance were strongly correlated, we ran  
394 partial mantel tests between epigenetic distance and climatic distance accounting for  
395 the geographic distance. In this case, most of the significant correlations disappeared,  
396 except for MPs in the CHH context.

397

398 Table 2. Mantel test coefficients for the correlation between epigenetic distance and  
399 genetic, geographic, and climatic distance in ramets. Epigenetic distance was tested  
400 both as individual methylated positions (MPs) and differentially methylated regions  
401 (DMRs). Significant correlations are highlighted in bold font.

|      | Context | Genetic distance |       | Geographic distance |                  | Climatic distance |                  | Climatic distance (partial) |              |
|------|---------|------------------|-------|---------------------|------------------|-------------------|------------------|-----------------------------|--------------|
|      |         | R                | p     | R                   | p                | R                 | p                | R                           | p            |
| MPs  | CG      | 0.001            | 0.445 | <b>0.093</b>        | <b>0.002</b>     | <b>0.082</b>      | <b>0.001</b>     | 0.015                       | 0.258        |
|      | CHG     | 0.009            | 0.330 | <b>0.079</b>        | <b>0.011</b>     | <b>0.068</b>      | <b>0.005</b>     | 0.012                       | 0.307        |
|      | CHH     | 0.035            | 0.231 | 0.043               | 0.115            | <b>0.067</b>      | <b>0.012</b>     | <b>0.054</b>                | <b>0.036</b> |
| DMRs | CG      | 0.043            | 0.202 | <b>0.164</b>        | <b>&lt;0.001</b> | <b>0.141</b>      | <b>&lt;0.001</b> | 0.023                       | 0.192        |
|      | CHG     | 0.005            | 0.381 | <b>0.080</b>        | <b>0.003</b>     | <b>0.072</b>      | <b>0.001</b>     | 0.015                       | 0.237        |
|      | CHH     | -0.008           | 0.536 | <b>0.063</b>        | <b>0.021</b>     | <b>0.064</b>      | <b>0.005</b>     | 0.025                       | 0.152        |

402

403

404 To study the association between methylation patterns and climate of origin in more  
405 detail, we conducted a correlation analysis between global methylation levels in specific  
406 genomic features (i.e., promoters, coding sequences (CDS) and TEs) and bioclimatic  
407 variables (Figure 3). We found significant correlations in all sequence contexts, with the  
408 highest number of correlations observed in the CHH context. In fact, for the CHH  
409 context, we found correlations between all three genomic features and most  
410 temperature-related bioclimatic variables, such as maximum temperature and mean  
411 temperature related variables. Additionally, methylation levels in promoters and TEs in  
412 this context were negatively correlated with both latitude and longitude. On the other  
413 hand, methylation levels in the CG and CHG contexts showed no correlation with

414 climatic variables, except for methylation in promoter and CDS regions and three  
415 precipitation variables (precipitation in the wettest month and wettest quarter, and  
416 precipitation in the warmest quarter). Furthermore, variables in CHH were grouped in a  
417 separate cluster while CG and CHG variables grouped mainly by genomic features.

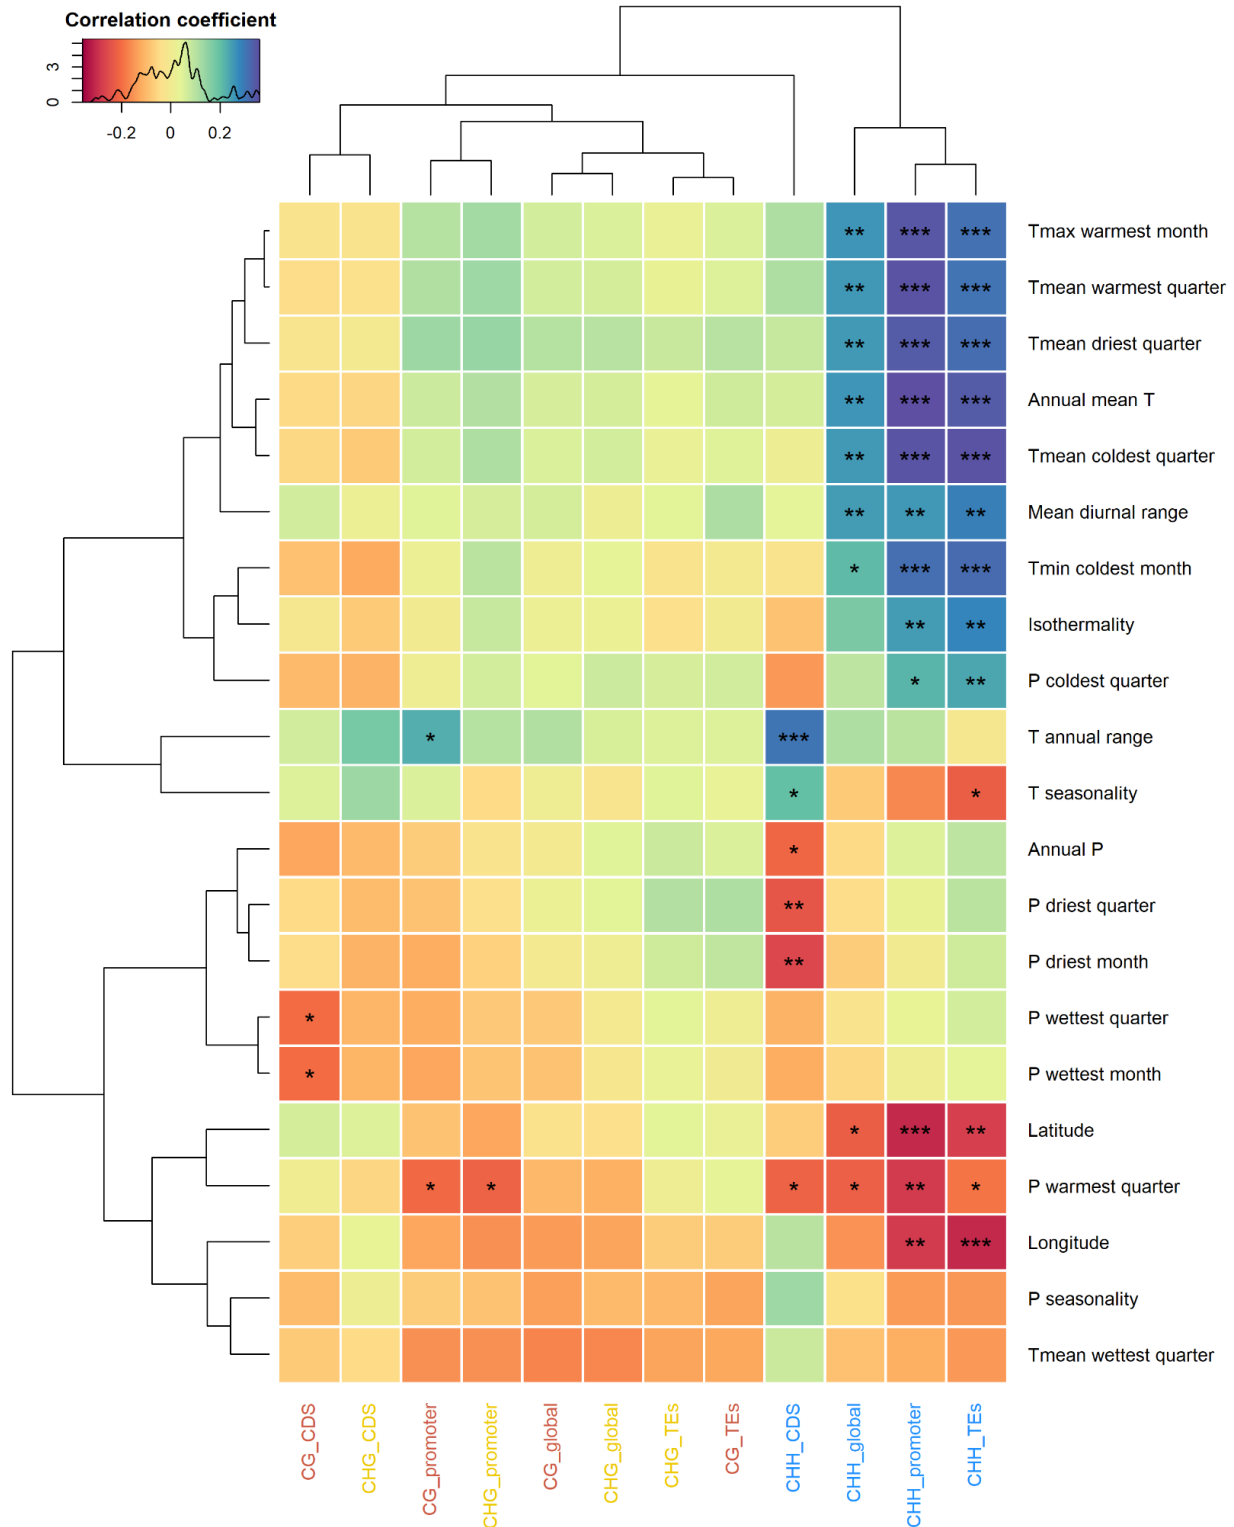

418

419

420

421 Figure 3. Spearman correlation analysis between global methylation levels in different  
422 genomic features and bioclimatic variables extracted from the CHELSA database. P =  
423 precipitation, T = temperature. P-values are adjusted for multiple pairwise comparisons  
424 using the “BH” method. Statistically significant correlations are labeled with the following  
425 code:  $p < 0.001 = ***$ ;  $p < 0.01 = **$ ;  $p < 0.05 = *$ . Variables are grouped by hierarchical  
426 clustering based on correlation coefficients.

427

### 428 **Persistence of DNA methylation patterns across clonal generations**

429 To investigate if methylation patterns can be transmitted to the next clonal generation,  
430 we first compared average global methylation levels between ortets (parental  
431 individuals) and ramets (clonal offspring). In the ortets, methylation levels were  
432 consistently higher in all contexts (Figure 4A). The difference in global methylation  
433 levels between ortets and ramets was further evidenced by the number of  
434 hypermethylated ortet-vs-ramet DMRs (Figure 4B). When comparing ortets with their  
435 ramets, the number of DMRs in the CG context was considerably low for some groups  
436 (e.g. ES, IT2, FR1, CZ, NO), and the lowest of all contexts (10,180 total DMRs vs.  
437 31,600 and 13,601 for CHG and CHH, respectively). On the other hand, the number of  
438 DMRs in the CHG and CHH contexts was more variable among different sites.  
439 Additionally, we conducted a PCA analysis using the paired clones (Figure S6) and  
440 found that pairs tended to group together, especially in the CG context.  
441 To further assess if methylation patterns persisted across clonal generations, we then  
442 intersected the DMRs found between pairwise comparisons in the ortets and the DMRs  
443 found between the ramets (Figure 4C). Between 25% and 50% of the ortet DMRs in CG

444 and CHG overlapped with ramet DMRs. This percentage was considerably lower in the  
445 case of the CHH context, where less than 10% of the DMRs were also found in the  
446 ramets.



a

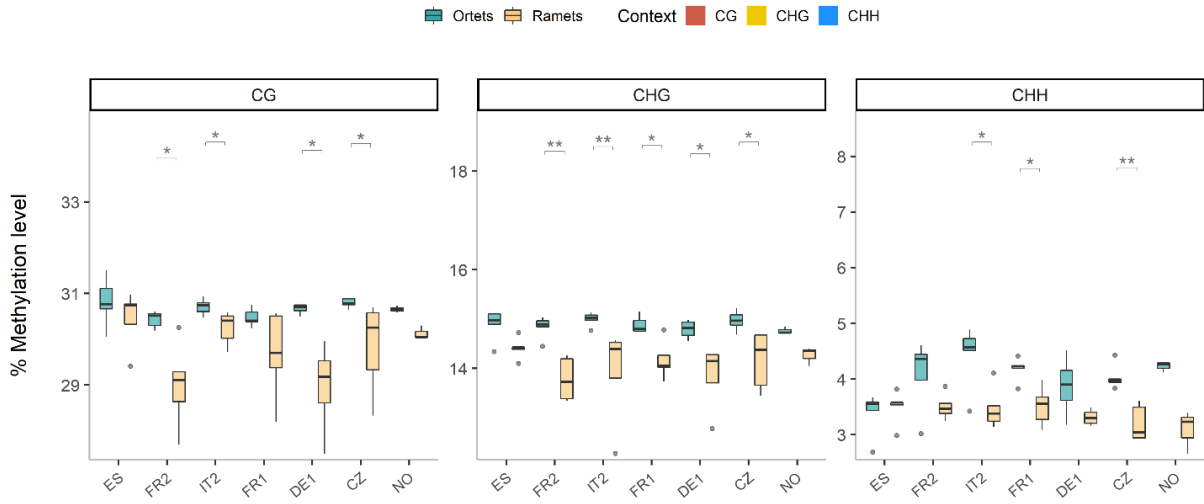

b

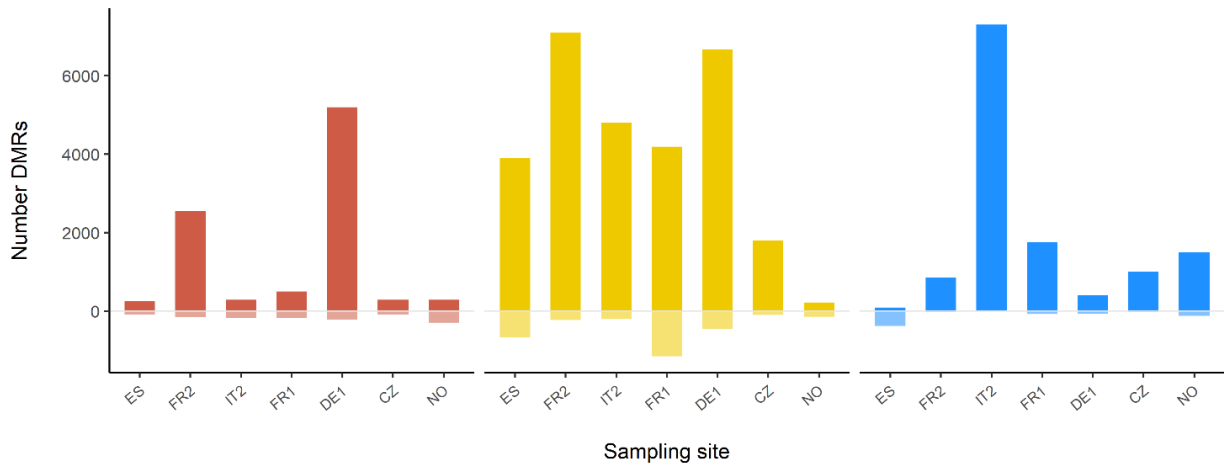

c

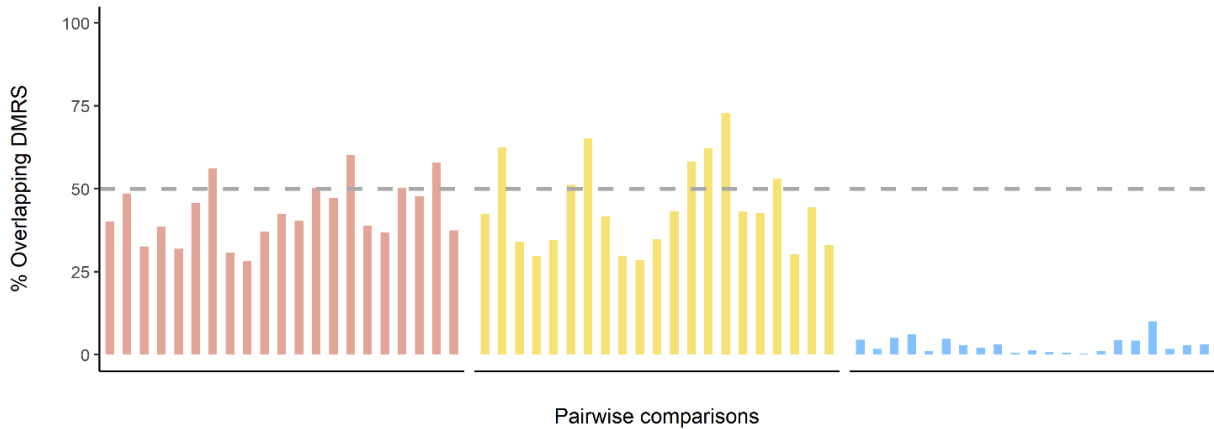

448 Figure 4. Differences in methylation profiles between ortets and ramets. a. Differences  
449 in global methylation levels between ortets (green) and their paired ramets (orange), for  
450 each sequence context. Statistically significant correlations are labeled with the  
451 following code:  $p < 0.001 = ***$ ;  $p < 0.01 = **$ ;  $p < 0.05 = *$ . P values were adjusted for  
452 multiple pairwise testing using the “BH” method. b. Total number of hypermethylated  
453 (above the 0 line) and hypomethylated (below the 0 line) DMRs between ortets and their  
454 paired ramets. c. Percentage of DMRs among ramet pairwise comparisons that overlap  
455 with DMRs among ortet pairwise comparisons. Each bar represents a pairwise  
456 comparison between ortets from each sampled site in Europe and the ramets of the  
457 same individuals. The dashed line indicates the threshold for 50% of ramet DMRs that  
458 overlap with ortet DMRs.

459

## 460 Discussion

461 So far only few studies have used epigenomics to investigate the effects of  
462 environmentally induced epigenetic variation at a landscape level. Here, we present the  
463 first landscape-scale investigation of DNA methylation patterns in a system that has  
464 been almost exclusively clonally propagated. We found that average methylation levels  
465 were significantly correlated with climatic variables, specifically in TEs and gene  
466 promoter regions, and persisted across at least one clonal generation, despite the lack  
467 of evident genetic or epigenetic structure.

468 The lack of genetic structure can be explained by the very low genetic diversity found by

469 genotyping the poplar clones (ramets) established in our common garden (Figure 2a).  
470 This was expected, given the clonal history of the 'Italica' cultivar. The 'Italica' cultivar  
471 likely originated from a single male clone in Central Asia, from where it spread to  
472 Europe. It is widely accepted that this clone was further artificially propagated from an  
473 individual or group of individuals found in Lombardy, Italy (Elwes and Henry, 1913). Our  
474 results suggest that a major fraction of the clones across Europe do indeed share a  
475 common line.

476 In a similar fashion, we did not find any clear epigenetic population structure but there  
477 appears to be some grouping in the CG context (Figure 2b) and epigenetic distance  
478 was positively correlated with geographic distance (Table 2). Furthermore, MPs inside  
479 CDS regions do show a pattern, but it was not explained by any of the environmental  
480 variables used in the analysis. This evidence points to the importance of other sources  
481 of epigenetic variation, such as genetic somatic mutations or stochastic epimutations.  
482 Several studies have reported age-related changes in the levels of cytosine methylation  
483 due to spontaneous methylation changes (Fraga *et al.*, 2002; Dubrovina & Kiselev,  
484 2016). Furthermore, Hofmeister *et al.* (2020) found evidence that spontaneous  
485 methylation changes are cumulative across somatic development in the close relative  
486 *Populus trichocarpa*, and that they have a higher rate than genetic mutations.  
487 Considering that the 'Italica' cultivar has been artificially propagated for the last two  
488 centuries, stochastic epimutations have likely accumulated across several clonal  
489 generations, confounding any environmentally induced epigenetic population structure.  
490 Previous studies on population epigenomics have found that epigenetic variation is  
491 associated with genetic variation in Brassicaceae (Dubin *et al.*, 2015, Kawakatsu *et al.*,

492 2016; Galanti *et al.*, 2022), thus hindering the study of the relationship between  
493 environmental epigenetic variation and climatic conditions. The use of a clonal cultivar  
494 circumvents this problem. We used mantel tests to investigate if epigenetic distance,  
495 measured as the distance between both single methylated variants (MPs) and  
496 differentially methylated regions (DMRs), was correlated with genetic, geographic  
497 and/or climatic distance (Table 2). We found that epigenetic distance did not correlate  
498 with genetic distance in all cases except one (MPs in the CHH context) but correlated  
499 with both geographic distance and climatic distance in almost all cases (see also Figure  
500 S2). However, when accounting for geographic distance, the correlations with climatic  
501 distance disappeared, except for MPs in the CHH context. As suggested above, if  
502 stochastic epimutations are contributing to a major fraction of the epigenetic variation,  
503 the correlation between epigenetic distance and geographic distance could be  
504 explained by isolation-by-distance processes, since this cultivar was gradually  
505 propagated across Europe (Slatkin, 1993). This evidence thus suggests that epigenetic  
506 variation of the individuals analyzed might be both under environmental and stochastic  
507 control.

508 To assess whether the methylation profiles under climatic control could potentially have  
509 a functional role, we extracted the methylation levels of specific genomic features (gene  
510 promoters, gene body and transposable elements, specifically). We then correlated  
511 methylation levels with individual bioclimatic variables (Figure 3). Methylation levels  
512 were strongly correlated with most temperature variables, particularly in the case of  
513 gene promoters and TEs in the CHH context, which would also explain the correlation  
514 with latitude and longitude. Our results are in line with previous studies that have

515 reported the potential effects of temperature on DNA methylation in several plant  
516 organisms (Dubin et al., 2015; Conde et al., 2017; Zhang et al., 2018; Galanti et al.,  
517 2022; Sammarco et al., 2022). On the other hand, methylation levels correlated with  
518 very few precipitation variables but, as opposed to temperature variables, we observed  
519 more significant correlations in the CG and CHG context. It is conceivable that a certain  
520 degree of environmental information regarding water availability might be encoded in  
521 more stable methylation contexts and transmitted to the clonal offspring, since *Populus*  
522 *nigra* is a riparian species that depends on river flooding regimes for successful seed  
523 and cutting dispersal (Smulders *et al.*, 2008). Nevertheless, our results indicate that  
524 methylation patterns in CHH might be highly dynamic and rapidly respond to new  
525 environmental cues. This assumption is further supported by the changes in global  
526 methylation levels observed between ortet-ramet pairs (Figure 4A). Although there were  
527 almost no differences in methylation levels between individuals from different  
528 geographic origins in any of the contexts, methylation levels were significantly higher in  
529 the ortets than in the corresponding ramets for many locations. In poplar, methylation  
530 levels have been shown to increase under drought conditions (Raj *et al.*, 2011; Peña  
531 Pontón *et al.*, 2022). Given that 2018 was a year characterized by particularly extreme  
532 drought events in Europe, and the ramets were well watered during the whole summer,  
533 it is possible that the differences in methylation levels between ortets and ramets are  
534 the result of differences in water availability. Furthermore, we observed a considerable  
535 decrease in the number of DMRs found among ramets (Supplementary Figure 2),  
536 suggesting that methylation profiles in leaves in the CHH context might have already  
537 adjusted to the new conditions of the common garden.

538 Despite these dynamic changes in CHH methylation, a considerable fraction of the  
539 methylation patterns appeared to be transmitted to the clonal offspring, particularly in  
540 the CG and CHG contexts. We found that approximately 25% of the DMRs in CG and  
541 CHG called from pairwise comparisons among the ramets of different sampled sites  
542 overlapped with the DMRs found among the ramets of the same pairwise comparison  
543 (Figure 4C). The fact that we could find these specific regions both in the ortets and the  
544 ramets provides further evidence that methylation patterns in the CG and CHG contexts  
545 can potentially be transmitted to the clonal offspring. Conversely, less than 10% of the  
546 DMRs found in the CHH context were transmitted to the next clonal generation. This  
547 further supports our conclusion that methylation in the CHH context is highly dynamic..  
548 It is, however, challenging to determine if there was an active change in the methylome  
549 as a result of new environmental cues, or if these patterns are established *de novo*  
550 every year in leaf tissue. If in fact leaf CHH methylation patterns are determined in every  
551 new season, this could possibly explain the low number of DMRs observed in the CHH  
552 context, both among the ortets and the ramets (Supplementary Figure S2). If the  
553 environmental conditions in the common garden resemble those of the original sites,  
554 then the methylome in CHH in the ramets would also resemble the methylome of the  
555 ortets. If the conditions are nothing alike, then a higher number of DMRs would be  
556 expected. Based on the total number of DMRs, the latter might be true. The number of  
557 DMRs was considerably higher when comparing ortets sampled in Spain with ortets  
558 sampled in Northern European sites (Figure S2), while only a few DMRs were found  
559 between sites that belong to similar Köppen climatic areas (e.g., FR1 vs FR2). In the  
560 common garden, however, where the environmental conditions were the same for all

561 the individuals, the number of total DMRs between ramets from different sites was very  
562 low, suggesting that the ramets might have rapidly adjusted to common garden  
563 conditions. As proposed by Ito and colleagues (2019), DNA methylation in natural  
564 environments might have two components, genomic regions that might change  
565 dynamically and epigenetic marks for stable gene expression that are rather fixed. If this  
566 is the case, it opens interesting new research possibilities, if a certain fraction of  
567 epigenetic information is stored in symmetrical stable contexts, but some of it can  
568 rapidly shift to reflect new environments. In practical terms, this would imply that  
569 methylation variation is partitioned in distinct “modules”, and further experiments should  
570 target individual sources of environmentally induced epigenetic variation.

571 In summary, our study is the first landscape-scale investigation of DNA methylation  
572 patterns in a system that has been almost exclusively clonally propagated. We found  
573 that methylation patterns in the Lombardy poplar are independent of genetic structure,  
574 but that methylation profiles are associated with climatic conditions. Furthermore, we  
575 have shown that a fraction of DMRs is transmitted to the next clonal generation, and  
576 that methylation in the CHH levels is highly dynamic and might rapidly adjust to new  
577 environmental conditions. Our results suggest that the CHH context is the most  
578 responsive to changing environments and that the stability of induced changes across  
579 clonal generations is stronger in CG and CHG. We have shown that the Lombardy  
580 poplar is a valuable system to study environmentally induced epigenetic variation in a  
581 naturally occurring near-isogenic population, with limited confounding genetic variation.  
582 Our study provides further insight into how methylation patterns in natural populations  
583 might vary along geographic and climatic gradients. However, further research is

584 necessary to assess whether DNA methylation can have an effect on phenotypic  
585 plasticity. The high resolution methylome data generated in our experiment is a  
586 significant resource for Epigenome Wide Association Studies (EWAS), and can  
587 considerably contribute to our understanding of how methylation variation affects plant  
588 acclimation and adaptation.

589

590

## 591 Acknowledgements

592 We thank members of the EpiDiverse consortium ([www.epidiverse.eu](http://www.epidiverse.eu)) for valuable  
593 inputs during preparation and execution of the study, and reviewers for useful  
594 comments. For computing, we acknowledge Prof. Peter Stadler at the University of  
595 Leipzig and David Langenberger from ecSeq, for hosting the EpiDiverse servers.  
596

## 597 Funding

598 This work was supported by the European Training Network “EpiDiverse” and received  
599 funding from the EU Horizon 2020 program under Marie SkłodowskaCurie grant  
600 agreement No 764965; the work was further supported by the Austrian Academy of  
601 Sciences (ÖAW). KH was supported by the Eva Mayr-Stihl Foundation.

602

603



## 604 Author contributions

605

606 **Bárbara Díez Rodríguez:** Methodology, formal analysis, Investigation, Software -  
607 implementation of the computer code and supporting algorithms; testing of existing code  
608 components, writing - original draft, visualization

609 **Dario Galanti:** Formal analysis (WGBS SNPs), Software - implementation of the  
610 computer code and supporting algorithms; testing of existing code components; Writing  
611 – Review & Editing

612 **Adam Nunn:** Software – Programming, software development, implementation of the  
613 computer code and supporting algorithms; testing of existing code components; Data  
614 curation, Writing – Review & Editing

615 **Cristian Peña:** Software - implementation of the computer code and supporting  
616 algorithms; testing of existing code components, Writing – Review & Editing

617 **Paloma Pérez-Bello:** Software - implementation of the computer code and supporting  
618 algorithms; testing of existing code components, Writing – Review & Editing

619 **Iris Sammarco:** Software - implementation of the computer code and supporting  
620 algorithms; testing of existing code components; Writing – Review & Editing

621 **Claude Becker:** Writing – Review & Editing, Supervision

622 **Katharina Jandrasits:** Investigation – Library preparation

623 **Emanuele de Paoli:** Writing – Review & Editing

624 **Koen J.F. Verhoeven:** Writing – Review & Editing, Supervision, Project administration,  
625 Funding acquisition

626 **Lars Opgenoorth:** Conceptualization, Writing – Review & Editing, Supervision, Project  
627 administration, Funding acquisition

628 **Katrin Heer:** Conceptualization, Writing – Review & Editing, Supervision, Project  
629 administration, Funding acquisition

630

## 631 Data availability

632

633 The *Populus nigra* cv 'Italica' reference genome and the genome annotations are freely

634 available at the European Nucleotide Archive (ENA) under project number

635 PRJEB44889. All sequenced raw fastq files are available under project number  
636 PRJEB44879. Bioclimatic data for all sequenced individuals is available in Zenodo at  
637 <https://doi.org/10.5281/zenodo.5995424>.

638

639

## 640 References

641 **Ally D, Ritland K, Otto SP. 2008.** Can clone size serve as a proxy for clone age? An exploration  
642 using microsatellite divergence in *Populus tremuloides*. *Molecular Ecology* **17**: 4897–4911.

643 **Avramidou E v., Ganopoulos I v., Doulis AG, Tsaftaris AS, Aravanopoulos FA. 2015.**  
644 Beyond population genetics: natural epigenetic variation in wild cherry (*Prunus avium*). *Tree*  
645 *Genetics and Genomes* **11**: 1–9.

646 **Balloux F, Lehmann L, de Meeûs T. 2003.** The Population Genetics of Clonal and Partially  
647 Clonal Diploids. *Genetics* **164**: 1635–1644.

648 **Bates D, Mächler M, Bolker B, Walker S. 2015.** Fitting Linear Mixed-Effects Models Using  
649 **lme4**. *Journal of Statistical Software* **67**.

650 **Becker C, Hagmann J, Müller J, Koenig D, Stegle O, Borgwardt K, Weigel D. 2011.**  
651 Spontaneous epigenetic variation in the *Arabidopsis thaliana* methylome. *Nature* **2011 480**:7376  
652 **480**: 245–249.

653 **Becker C, Weigel D. 2012.** Epigenetic variation: origin and transgenerational inheritance.  
654 *Current Opinion in Plant Biology* **15**: 562–567.

655 **Boquete MT, Muyle A, Alonso C. 2021.** Plant epigenetics: phenotypic and functional diversity

- 656 beyond the DNA sequence. *American Journal of Botany* **108**: 553–558.
- 657 **Bräutigam K, Vining KJ, Lafon-Placette C, Fossdal CG, Mirouze M, Marcos JG, Fluch S,**  
658 **Fraga MF, Guevara MÁ, Abarca D, et al. 2013.** Epigenetic regulation of adaptive responses of  
659 forest tree species to the environment. *Ecology and Evolution* **3**: 399–415.
- 660 **vanden Broeck A, Cox K, Brys R, Castiglione S, Ciccattelli A, Guarino F, Heinze B,**  
661 **Steenackers M, vander Mijnsbrugge K. 2018.** Variability in DNA Methylation and Generational  
662 Plasticity in the Lombardy Poplar, a Single Genotype Worldwide Distributed Since the  
663 Eighteenth Century. *Frontiers in Plant Science* **9**: 1635.
- 664 **CABI: *Populus Nigra (Black Poplar)*.** <https://www.cabi.org/isc/datasheet/43535>. Accessed 24  
665 Jan. 2022.
- 666 **Chenault N, Arnaud-Haond S, Juteau M, Valade R, Almeida JL, Villar M, Bastien C,**  
667 **Dowkiw A. 2011.** SSR-based analysis of clonality, spatial genetic structure and introgression  
668 from the Lombardy poplar into a natural population of *Populus nigra* L. along the Loire River.  
669 *Tree Genetics & Genomes* 2011 7:6 7: 1249–1262.
- 670 **Climate Change 2022: Impacts, Adaptation and Vulnerability | Climate Change 2022:**  
671 **Impacts, Adaptation and Vulnerability.**
- 672 **Conde D, le Gac AL, Perales M, Dervinis C, Kirst M, Maury S, González-Melendi P, Allona**  
673 **I. 2017.** Chilling-responsive DEMETER-LIKE DNA demethylase mediates in poplar bud break.  
674 *Plant, Cell & Environment* **40**: 2236–2249.
- 675 **Core Team R. 2017.** R: A language and environment for statistical computing. R Foundation for  
676 Statistical Computing. *Vienna, Austria: URL <https://www.R-project.org/>.*[Google Scholar].
- 677 **Danecek P, Auton A, Abecasis G, Albers CA, Banks E, DePristo MA, Handsaker RE,**

- 678 **Lunter G, Marth GT, Sherry ST, et al. 2011.** The variant call format and VCFtools.  
679 *Bioinformatics* **27**: 2156–2158.
- 680 **Díez Rodríguez B, Peña C, Pérez-Bello P, Bette J, Lerbs L, Mackenbach T, Wulle S, de**  
681 **Paoli E, Verhoeven KJF, Heer K, et al. 2022.** An Uncommon Garden Experiment:  
682 Microenvironment Has Stronger Influence on Phenotypic Variation than Epigenetic Memory in  
683 the Clonal Lombardy Poplar. *SSRN Electronic Journal*.
- 684 **Dubin MJ, Zhang P, Meng D, Remigereau MS, Osborne EJ, Casale FP, Drewe P, Kahles A,**  
685 **Jean G, Vilhjálmsson B, et al. 2015.** DNA methylation in Arabidopsis has a genetic basis and  
686 shows evidence of local adaptation. *eLife* **4**.
- 687 **Dubrovina AS, Kiselev K v. 2016.** Age-associated alterations in the somatic mutation and DNA  
688 methylation levels in plants. *Plant Biology* **18**: 185–196.
- 689 **Elwes HJ, Henry A. 1913.** The trees of Great Britain & Ireland. R. & R. Clark, Limited,  
690 Edinburgh, 2022 pp.
- 691 **Finnegan EJ, Genger RK, Peacock WJ, Dennis ES. 2003.** DNA METHYLATION IN PLANTS.  
692 <http://dx.doi.org/10.1146/annurev.arplant.49.1.223> **49**: 223–247.
- 693 **Fisher RA. 1958.** *The genetical theory of natural selection*. Рипол Классик.
- 694 **Fraga MF, Rodriguez R, Canal MJ. 2002.** Genomic DNA methylation-demethylation during  
695 aging and reinvigoration of *Pinus radiata*. *Tree Physiology* **22**: 813–816.
- 696 **Fu YB. 2015.** Understanding crop genetic diversity under modern plant breeding. *Theoretical*  
697 *and Applied Genetics* **128**: 2131–2142.
- 698 **Galanti D, Ramos-Cruz D, Nunn A, Rodríguez-Arévalo I, Scheepens JF, Becker C,**

- 699 **Bossdorf O. 2022.** Genetic and environmental drivers of large-scale epigenetic variation in  
700 *Thlaspi arvense* (NM Springer, Ed.). *PLOS Genetics* **18**: e1010452.
- 701 **Gáspár B, Bossdorf O, Durka W. 2019.** Structure, stability and ecological significance of  
702 natural epigenetic variation: a large-scale survey in *Plantago lanceolata*. *New Phytologist* **221**:  
703 1585–1596.
- 704 **Gugger PF, Fitz-Gibbon S, Pellegrini M, Sork VL. 2016.** Species-wide patterns of DNA  
705 methylation variation in *Quercus lobata* and their association with climate gradients. *Molecular*  
706 *Ecology* **25**: 1665–1680.
- 707 **Herman JJ, Sultan SE. 2016.** DNA methylation mediates genetic variation for adaptive  
708 transgenerational plasticity. *Proceedings of the Royal Society B: Biological Sciences* **283**.
- 709 **Herrera CM, Medrano M, Bazaga P. 2017.** Comparative epigenetic and genetic spatial  
710 structure of the perennial herb *Helleborus foetidus*: Isolation by environment, isolation by  
711 distance, and functional trait divergence. *American Journal of Botany* **104**: 1195–1204.
- 712 **Hofmeister BT, Denkena J, Colomé-Tatché M, Shahryary Y, Hazarika R, Grimwood J,**  
713 **Mamidi S, Jenkins J, Grabowski PP, Sreedasyam A, et al. 2020.** A genome assembly and  
714 the somatic genetic and epigenetic mutation rate in a wild long-lived perennial *Populus*  
715 *trichocarpa*. *Genome Biology* **21**: 1–27.
- 716 **Hughes AR, Inouye BD, Johnson MTJ, Underwood N, Vellend M. 2008.** Ecological  
717 consequences of genetic diversity. *Ecology Letters* **11**: 609–623.
- 718 **Ingvarsson PK, Dahlberg H. 2018.** The effects of clonal forestry on genetic diversity in wild  
719 and domesticated stands of forest trees. <https://doi.org/10.1080/02827581.2018.1469665> **34**:  
720 370–379.

- 721 **Ito, Nishio, Tarutani, Emura, Honjo, Toyoda, Fujiyama, Kakutani, Kudoh. 2019.** Seasonal  
722 Stability and Dynamics of DNA Methylation in Plants in a Natural Environment. *Genes* **10**: 544.
- 723 **Jansson S, Douglas CJ. 2007.** *Populus* : A Model System for Plant Biology. *Annual Review of*  
724 *Plant Biology* **58**: 435–458.
- 725 **Johannes F, Porcher E, Teixeira FK, Saliba-Colombani V, Simon M, Agier N, Bulski A,**  
726 **Albuisson J, Heredia F, Audigier P, et al. 2009.** Assessing the Impact of Transgenerational  
727 Epigenetic Variation on Complex Traits. *PLOS Genetics* **5**: e1000530.
- 728 **Johannes F, Schmitz RJ. 2019.** Spontaneous epimutations in plants. *New Phytologist* **221**:  
729 1253–1259.
- 730 **Jühling F, Kretzmer H, Bernhart SH, Otto C, Stadler PF, Hoffmann S. 2016.** metilene: fast  
731 and sensitive calling of differentially methylated regions from bisulfite sequencing data. *Genome*  
732 *Research* **26**: 256–262.
- 733 **Karger DN, Conrad O, Böhner J, Kawohl T, Kreft H, Soria-Auza RW, Zimmermann NE,**  
734 **Linder HP, Kessler M. 2017.** Climatologies at high resolution for the earth’s land surface areas.  
735 *Scientific Data* **4**: 170122.
- 736 **Kawakatsu T, Huang S shan C, Jupe F, Sasaki E, Schmitz RJJ, Urich MAA, Castanon R,**  
737 **Nery JRR, Barragan C, He Y, et al. 2016.** Epigenomic Diversity in a Global Collection of  
738 *Arabidopsis thaliana* Accessions. *Cell* **166**: 492–505.
- 739 **de Kort H, Panis B, Deforce D, van Nieuwerburgh F, Honnay O. 2020.** Ecological divergence  
740 of wild strawberry DNA methylation patterns at distinct spatial scales. *Molecular Ecology* **29**:  
741 4871–4881.
- 742 **Lämke J, Bäurle I. 2017.** Epigenetic and chromatin-based mechanisms in environmental stress

- 743 adaptation and stress memory in plants. *Genome Biology* **18**.
- 744 **Lira-Medeiros CF, Parisod C, Fernandes RA, Mata CS, Cardoso MA, Ferreira PCG. 2010.**  
745 Epigenetic Variation in Mangrove Plants Occurring in Contrasting Natural Environment. *PLOS*  
746 *ONE* **5**: e10326.
- 747 **Lister R, O'Malley RC, Tonti-Filippini J, Gregory BD, Berry CC, Millar AH, Ecker JR. 2008.**  
748 Highly Integrated Single-Base Resolution Maps of the Epigenome in Arabidopsis. *Cell* **133**:  
749 523–536.
- 750 **Matzke MA, Mosher RA. 2014.** RNA-directed DNA methylation: an epigenetic pathway of  
751 increasing complexity. *Nature Reviews Genetics* **2014 15:6 15**: 394–408.
- 752 **Medrano M, Herrera CM, Bazaga P. 2014.** Epigenetic variation predicts regional and local  
753 intraspecific functional diversity in a perennial herb. *Molecular Ecology* **23**: 4926–4938.
- 754 **Meloni M, Reid A, Caujapé-Castells J, Marrero Á, Fernández-Palacios JM, Mesa-Coelo RA,**  
755 **Conti E. 2013.** Effects of clonality on the genetic variability of rare, insular species: the case of  
756 *Ruta microcarpa* from the Canary Islands. *Ecology and Evolution* **3**: 1569–1579.
- 757 **Moore LD, Le T, Fan G. 2012.** DNA Methylation and Its Basic Function.  
758 *Neuropsychopharmacology* **2013 38:1 38**: 23–38.
- 759 **Nicotra AB, Segal DL, Hoyle GL, Schrey AW, Verhoeven KJF, Richards CL. 2015.** Adaptive  
760 plasticity and epigenetic variation in response to warming in an Alpine plant. *Ecology and*  
761 *Evolution* **5**: 634–647.
- 762 **Niederhuth CE, Schmitz RJ. 2017.** Putting DNA methylation in context: from genomes to gene  
763 expression in plants. *Biochimica et Biophysica Acta (BBA) - Gene Regulatory Mechanisms*  
764 **1860**: 149–156.

- 765 **Nunn A, Can SN, Otto C, Fasold M, Diéz Rodríguez B, Fernández-Pozo N, Rensing SA,**  
766 **Stadler PF, Langenberger D. 2021.** EpiDiverse Toolkit: a pipeline suite for the analysis of  
767 bisulfite sequencing data in ecological plant epigenetics. *NAR Genomics and Bioinformatics* **3**.
- 768 **Nunn A, Otto C, Fasold M, Stadler PF, Langenberger D. 2022.** Manipulating base quality  
769 scores enables variant calling from bisulfite sequencing alignments using conventional bayesian  
770 approaches. *BMC Genomics* **23**: 1–10.
- 771 **Oksanen J, Blanchet FG, Kindt R, Legendre P, Minchin PR, O’hara RB, Simpson GL,**  
772 **Solymos P, Stevens MHH, Wagner H. 2013.** Package ‘vegan’. *Community ecology package,*  
773 *version 2*: 1–295.
- 774 **Peel MC, Finlayson BL, McMahon TA. 2007.** Updated world map of the Köppen-Geiger  
775 climate classification. *Hydrology and Earth System Sciences* **11**: 1633–1644.
- 776 **Peña-Ponton, C., Diez-Rodriguez, B., Perez-Bello, P., Becker, C., McIntyre, L. M., Putten,**  
777 **W. van der, Paoli, E. de, Heer, K., Opgenoorth, L., & Verhoeven, KJF. (2022).** High-  
778 resolution methylome analysis in the clonal *Populus nigra* cv. ‘Italica’ reveals environmentally  
779 sensitive hotspots and drought-responsive TE superfamilies. *BioRxiv*, 2022.10.18.512698.
- 780 **Peter Meyer IN, Lohuis M ten. 1994.** Evidence for cytosine methylation of non-symmetrical  
781 sequences in transgenic *Petunia hybrida*. *The EMBO Journal* **13**: 2084–2088.
- 782 **Purcell S, Neale B, Todd-Brown K, Thomas L, Ferreira MAR, Bender D, Maller J, Sklar P,**  
783 **de Bakker PIW, Daly MJ, et al. 2007.** PLINK: A Tool Set for Whole-Genome Association and  
784 Population-Based Linkage Analyses. *The American Journal of Human Genetics* **81**: 559–575.
- 785 **Quinlan AR, Hall IM. 2010.** BEDTools: a flexible suite of utilities for comparing genomic  
786 features. *Bioinformatics* **26**: 841–842.



- 787 **Raj S, Bräutigam K, Hamanishi ET, Wilkins O, Thomas BR, Schroeder W, Mansfield SD,**  
788 **Plant AL, Campbell MM. 2011.** Clone history shapes Populus drought responses. *Proceedings*  
789 *of the National Academy of Sciences of the United States of America* **108**: 12521–12526.
- 790 **Rapp RA, Wendel JF. 2005.** Epigenetics and plant evolution. *New Phytologist* **168**: 81–91.
- 791 **Rasmussen KK, Kollmann J. 2007.** Low genetic diversity in small peripheral populations of a  
792 rare European tree (*Sorbus torminalis*) dominated by clonal reproduction. *Conservation*  
793 *Genetics* 2007 9:6 **9**: 1533–1539.
- 794 **Reinders J, Wulff BBH, Mirouze M, Marí-Ordóñez A, Dapp M, Rozhon W, Bucher E, Theiler**  
795 **G, Paszkowski J. 2009.** Compromised stability of DNA methylation and transposon  
796 immobilization in mosaic Arabidopsis epigenomes. *Genes & development* **23**: 939–950.
- 797 **Revelle, W. 2022.** psych: Procedures for Personality and Psychological Research,  
798 Northwestern University, Evanston, Illinois, USA, <https://CRAN.R-project.org/package=psych>  
799 Version = 2.2.5.
- 800 **Richards CL, Alonso C, Becker C, Bossdorf O, Bucher E, Colomé-Tatché M, Durka W,**  
801 **Engelhardt J, Gaspar B, Gogol-Döring A, et al. 2017.** Ecological plant epigenetics: Evidence  
802 from model and non-model species, and the way forward. *Ecology Letters* **20**: 1576–1590.
- 803 **Richards CL, Bossdorf O, Verhoeven KJF. 2010.** Understanding natural epigenetic variation.  
804 *New Phytologist* **187**: 562–564.
- 805 **Sammarco I, Münzbergová Z, Latzel V. 2022.** DNA Methylation Can Mediate Local Adaptation  
806 and Response to Climate Change in the Clonal Plant *Fragaria vesca*: Evidence From a  
807 European-Scale Reciprocal Transplant Experiment. *Frontiers in Plant Science* **13**: 435.
- 808 **Scaglione D, Pinosio S, Marroni F, Centa E di, Fornasiero A, Magris G, Scalabrin S,**

- 809 **Cattonaro F, Taylor G, Morgante M. 2019.** Single primer enrichment technology as a tool for  
810 massive genotyping: a benchmark on black poplar and maize. *Annals of Botany* **124**: 543–551.
- 811 **Schmitz RJ, He Y, Valdés-López O, Khan SM, Joshi T, Urich MA, Nery JR, Diers B, Xu D,**  
812 **Stacey G, et al. 2013.** Epigenome-wide inheritance of cytosine methylation variants in a  
813 recombinant inbred population. *Genome research* **23**: 1663–74.
- 814 **Schultz MD, Schmitz RJ, Ecker JR. 2012.** ‘Leveling’ the playing field for analyses of single-  
815 base resolution DNA methylomes. *Trends in Genetics* **28**: 583–585.
- 816 **Slatkin M. 1993.** ISOLATION BY DISTANCE IN EQUILIBRIUM AND NON-EQUILIBRIUM  
817 POPULATIONS. *Evolution* **47**: 264–279.
- 818 **Smulders MJM, Cottrell JE, Lefèvre F, van der Schoot J, Arens P, Vosman B, Tabbener**  
819 **HE, Grassi F, Fossati T, Castiglione S, et al. 2008.** Structure of the genetic diversity in black  
820 poplar (*Populus nigra* L.) populations across European river systems: Consequences for  
821 conservation and restoration. *Forest Ecology and Management* **255**: 1388–1399.
- 822 **Taylor G. 2002.** *Populus: Arabidopsis for Forestry. Do We Need a Model Tree?* *Annals of*  
823 *Botany* **90**: 681–689.
- 824 **Tuskan GA, DiFazio S, Jansson S, Bohlmann J, Grigoriev I, Hellsten U, Putnam M, Ralph**  
825 **S, Rombauts S, Salamov A, et al. 2006.** The genome of black cottonwood, *Populus*  
826 *trichocarpa* (Torr. & Gray). *Science* **313**: 1596–1604.
- 827 **Tuskan GA, Francis KE, Russ SL, Romme WH, Turner MG. 1996.** RAPD markers reveal  
828 diversity within and among clonal and seedling stands of aspen in Yellowstone National Park,  
829 U.S.A. *Canadian Journal of Forest Research* **26**: 2088–2098.
- 830 **Verhoeven KJF, Preite V. 2014.** Epigenetic variation in asexually reproducing organisms.

831 *Evolution* **68**: 644–655.

832 **Warnes G, Bolker B, Bonebakker L, Gentleman R, Huber W, Liaw A, Lumley T, Maechler**

833 **M, Magnusson A, Moeller S, Schwartz M, Venables B. 2022.** `ggplots`: Various R

834 Programming Tools for Plotting Data. R package version 3.1.3,

835 <https://CRAN.R-project.org/package=ggplots>.

836 **Wibowo, A., Becker, C., Marconi, G., Durr, J., Price, J., Haggmann, J., Papareddy, R., Putra,**

837 **H., Kageyama, J., Becker, J., Weigel, D., & Gutierrez-Marcos, J. (2016).** Hyperosmotic stress

838 memory in arabidopsis is mediated by distinct epigenetically labile sites in the genome and is

839 restricted in the male germline by dna glycosylase activity. *ELife*, 5(MAY2016).

840 <https://doi.org/10.7554/ELIFE.13546>

841 **Zemach A, Kim MY, Hsieh P-H, Coleman-Derr D, Eshed-Williams L, Thao K, Harmer SL,**

842 **Zilberman D. 2013.** The Arabidopsis Nucleosome Remodeler DDM1 Allows DNA

843 Methyltransferases to Access H1-Containing Heterochromatin. *Cell* **153**: 193–205.

844 **Zhang YY, Fischer M, Colot V, Bossdorf O. 2013.** Epigenetic variation creates potential for

845 evolution of plant phenotypic plasticity. *New Phytologist* **197**: 314–322.

846 **Zhang H, Lang Z, Zhu JK. 2018.** Dynamics and function of DNA methylation in plants. *Nature*

847 *Reviews Molecular Cell Biology 2018 19:8 19*: 489–506.

848 **Zhang X, Yazaki J, Sundaresan A, Cokus S, Chan SWL, Chen H, Henderson IR, Shinn P,**

849 **Pellegrini M, Jacobsen SE, et al. 2006.** Genome-wide High-Resolution Mapping and

850 Functional Analysis of DNA Methylation in Arabidopsis. *Cell* **126**: 1189–1201.
